# Supplementary material for: Terpene polymerization via a binary neodymium-based catalytic system with di- n -butylmagnesium as a co-catalyst
Source: Royal Society of Chemistry journal article supplement (doi:10.1039/d4ra07481e), 2025-01-01
Supplement: d4ra07481e1.pdf [file d4ra07481e1.pdf]

## Supporting Information

### Terpene Polymerization via a Binary Neodymium-Based Catalytic System with di-n-butylmagnesium as Co-Catalyst

Teresa Córdova<sup>a</sup>, Francisco Javier Enriquez-Medrano<sup>a</sup>, Ilse Magaña<sup>a</sup>, Maricela García-Zamora<sup>a</sup>, Nelson A. Jimenez-Reyes<sup>a</sup>, José M. Mata-Padilla<sup>a</sup>, Edgar E. Cabrera-Álvarez<sup>b</sup>, Luis Valencia<sup>\*c</sup> and Ramón Díaz de León<sup>\*a</sup>

<sup>a</sup> Research Center for Applied Chemistry, Blvd Enrique Reyna 140, 25294, Saltillo, Mexico. Ramon.diazdeleon@ciqa.edu.mx

<sup>b</sup> CONAHCYT, Research Center for Applied Chemistry Unidad Monterrey, Av. Alianza Sur 204 C.P. 66629, Apodaca Nuevo León, México.

<sup>c</sup> Biofiber Tech Sweden AB, Norrsken House, Birger Jarlsgatan 57 C, Stockholm, Sweden. Luisalex\_val@hotmail.com

### SEC and NMR Analysis of Myrcene under Different [Nd]:[Mg] Ratios and Temperatures

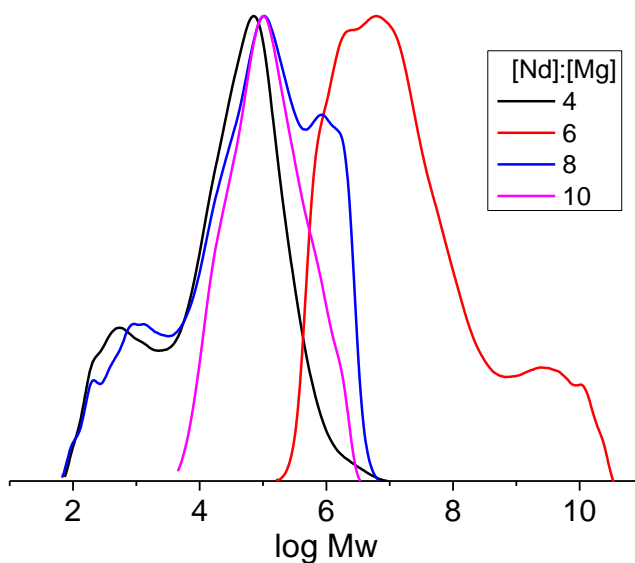

**Figure S1.** SEC curves at different [Nd]:[Mg] ratios at 50°C with an [Mon]:[Nd] ratio of 250. Experimental details in Table 1.

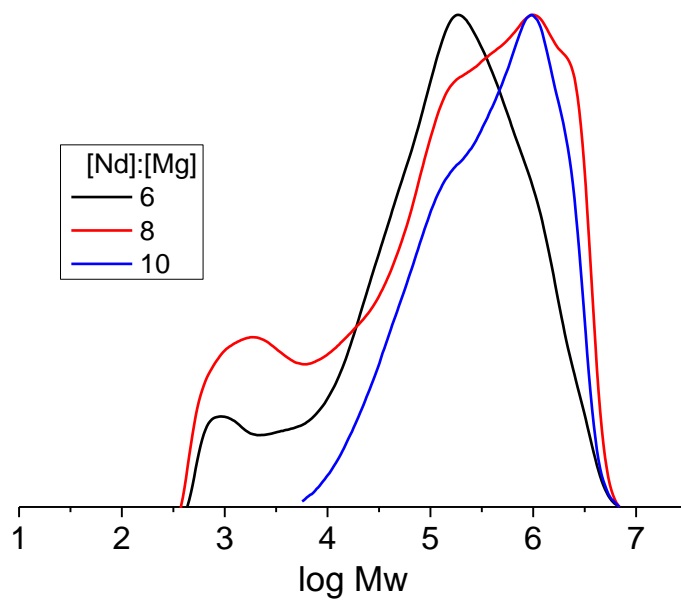

**Figure S2.** SEC curves at different [Nd]:[Mg] ratios at 60°C with an [Mon]:[Nd] ratio of 250. Experimental details in Table 1.

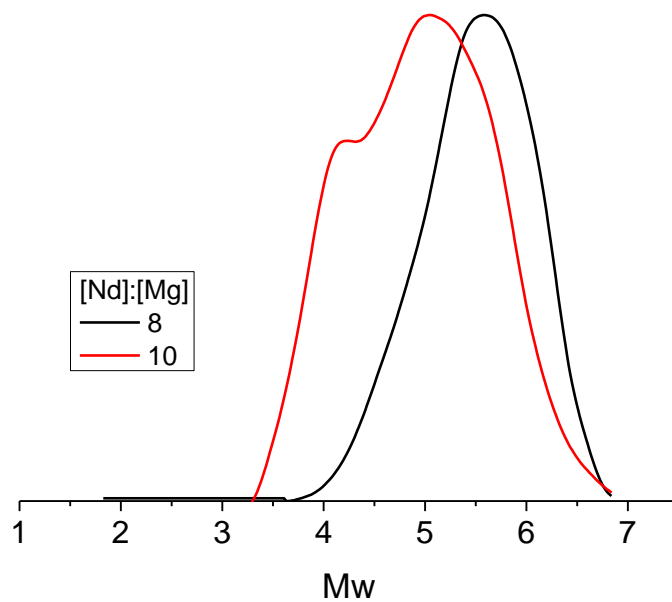

**Figure S3.** SEC curves at different [Nd]:[Mg] ratios at 70°C with an [Mon]:[Nd] ratio of 250. Experimental details in Table 1.

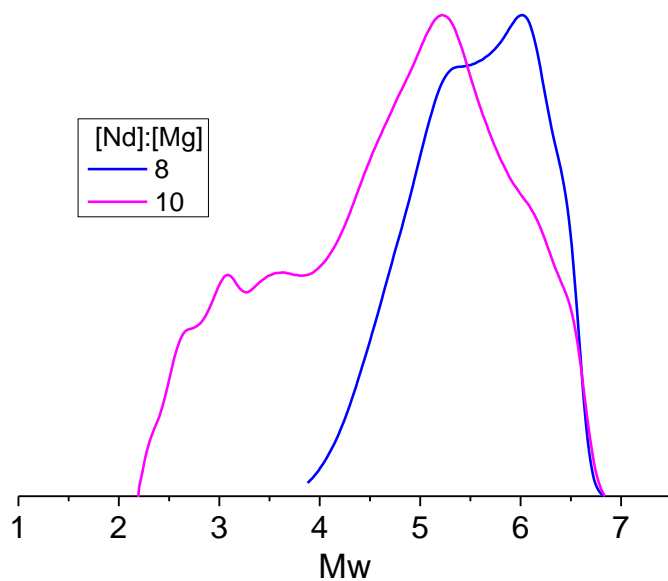

**Figure S4.** SEC curves at different [Nd]:[Mg] ratios at 70°C with an [Mon]:[Nd] ratio of 500. Experimental details in Table 1.

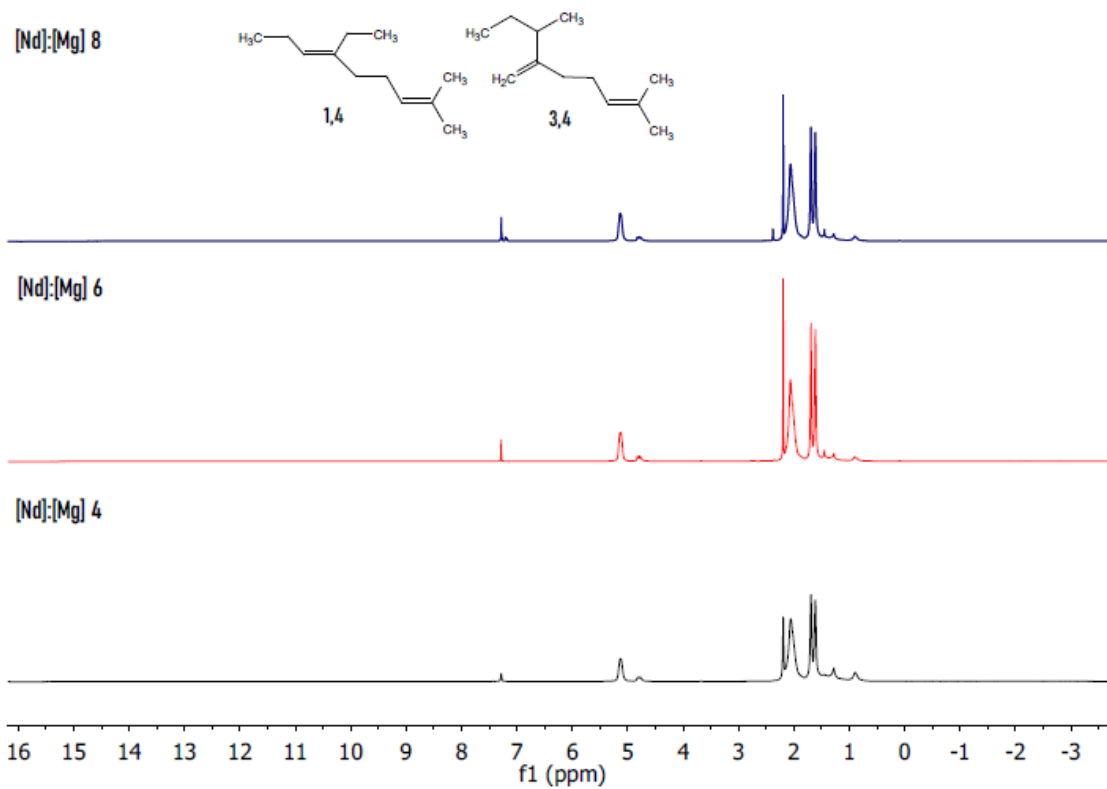

**Figure S5.**  $^1\text{H}$  NMR at different [Nd]:[Mg] ratios at 50°C with an [Mon]:[Nd] ratio of 250. Experimental details in Table 3.

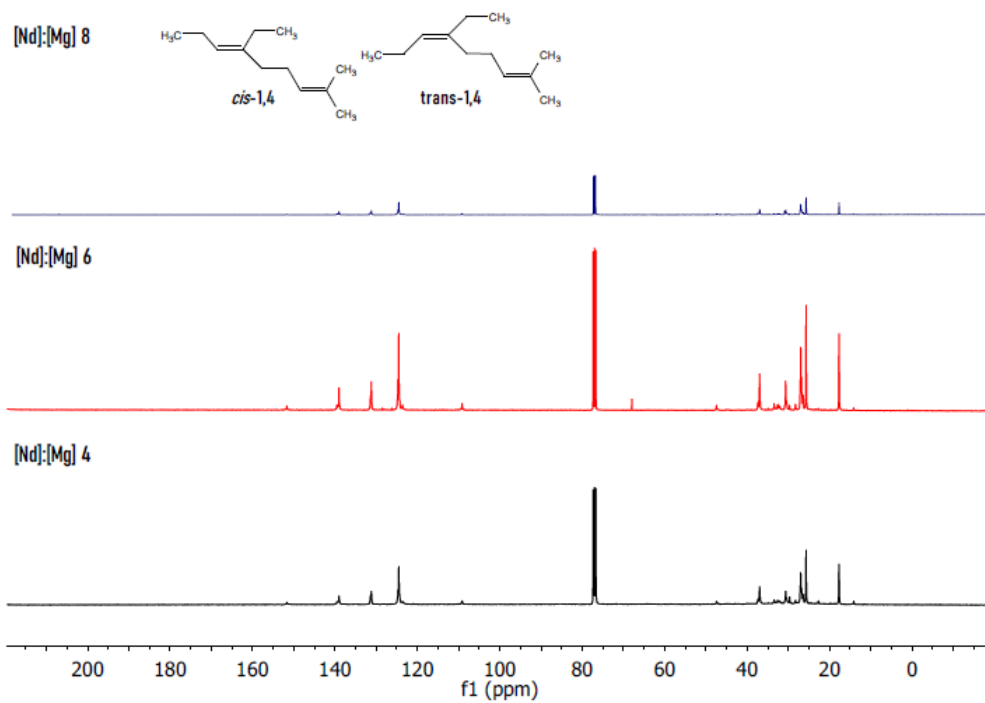

**Figure S6.**  $^{13}\text{C}$  NMR at different [Nd]:[Mg] ratios at 50°C with an [Mon]:[Nd] ratio of 250. Experimental details in Table 3.

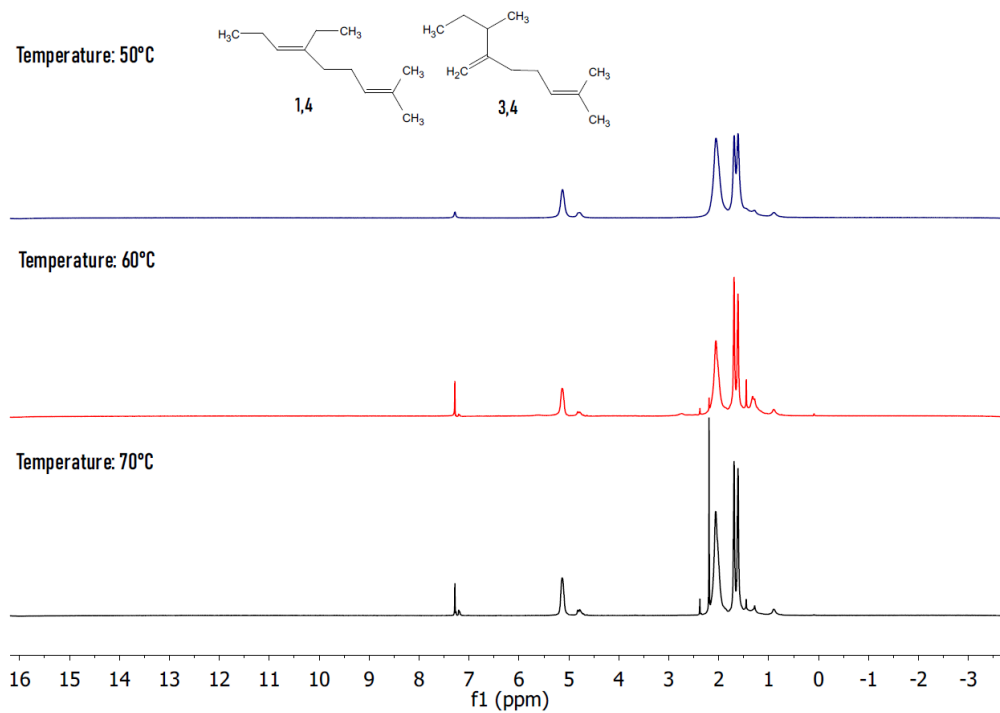

**Figure S7.**  $^1\text{H}$  NMR at [Nd]:[Mg] ratio of 8 at different temperature 50°C, 60°C and 70°C with an [Mon]:[Nd] ratio of 250. Experimental details in Table 3.

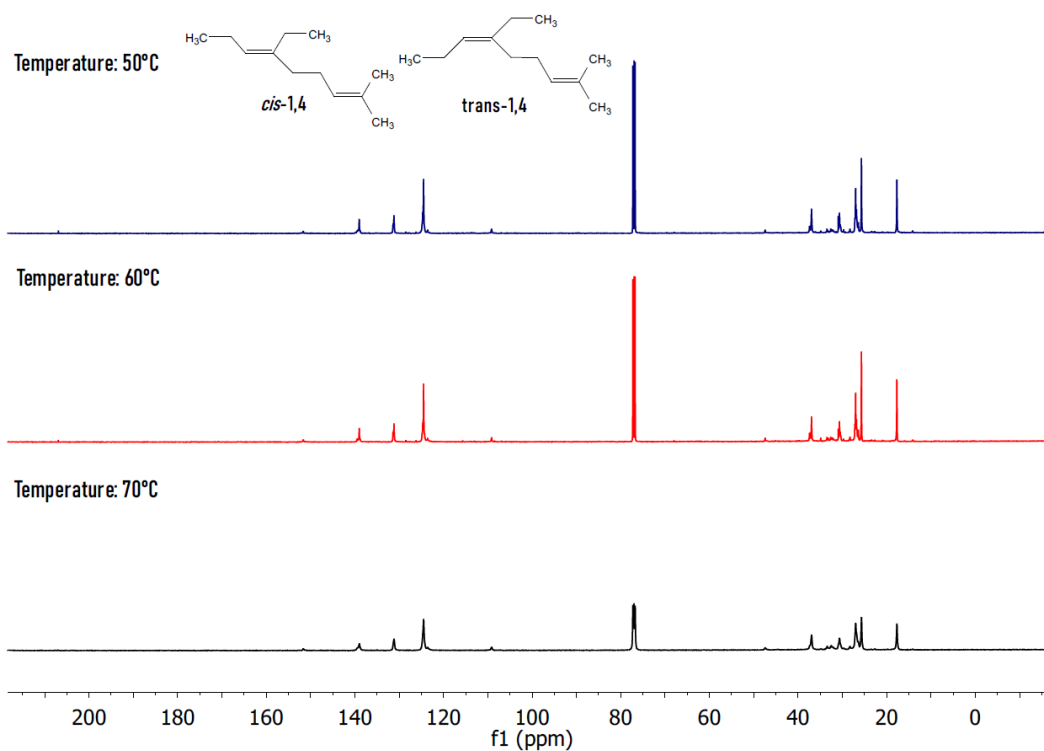

**Figure S8.**  $^{13}\text{C}$  NMR at [Nd]:[Mg] ratio of 8 at different temperature 50°C, 60°C and 70°C with an [Mon]:[Nd] ratio of 250. Experimental details in Table 3.

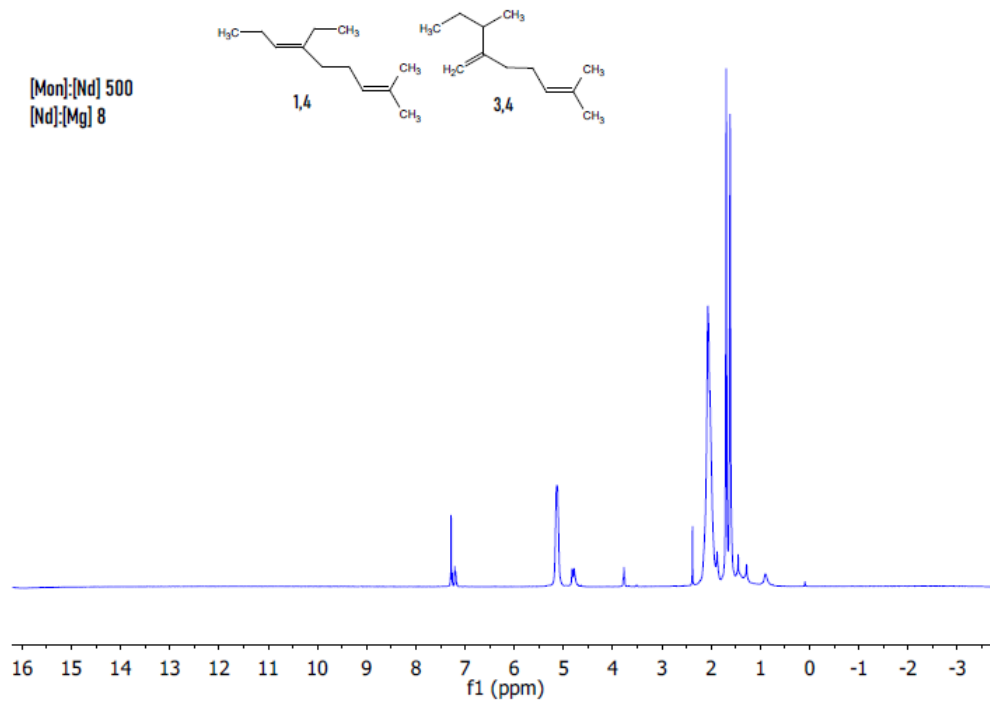

**Figure S9.**  $^1\text{H}$  NMR at [Mon]:[Nd] ratio of 500 at 70°C. Experimental details in Table 3.

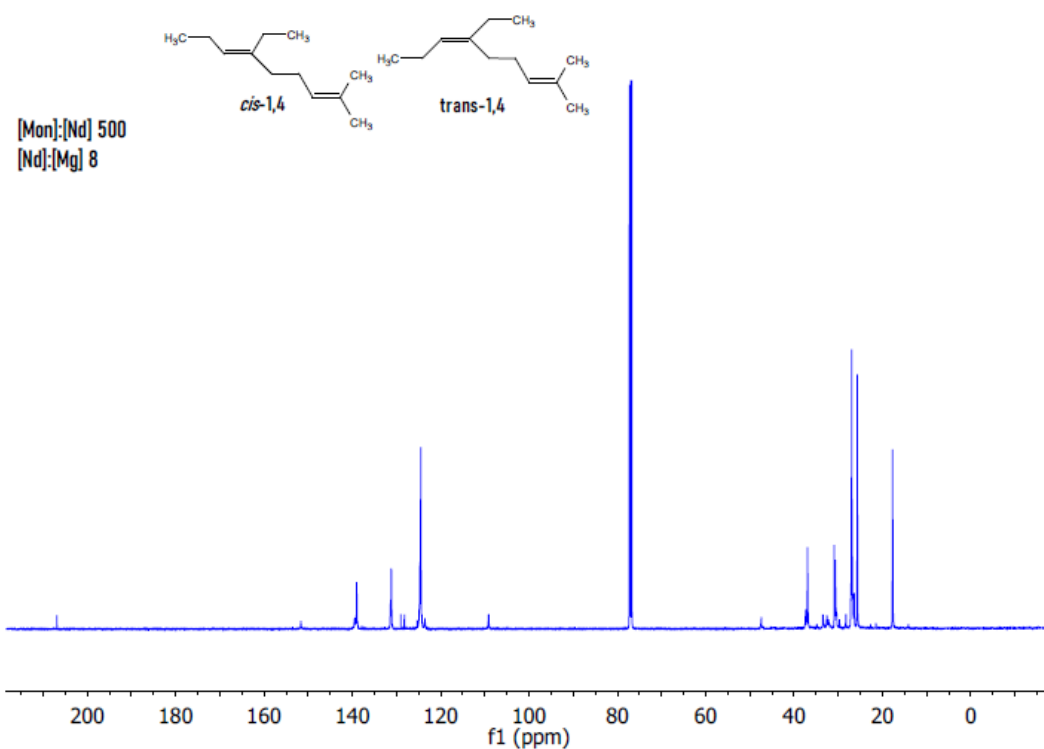

**Figure S10.**  $^{13}C$  NMR at  $[Mon]:[Nd]$  ratio of 500 at  $70^{\circ}C$ . Experimental details in Table 3.

### SEC and NMR Analysis of Farnesene under Different Mg/Nd Ratios and Temperatures

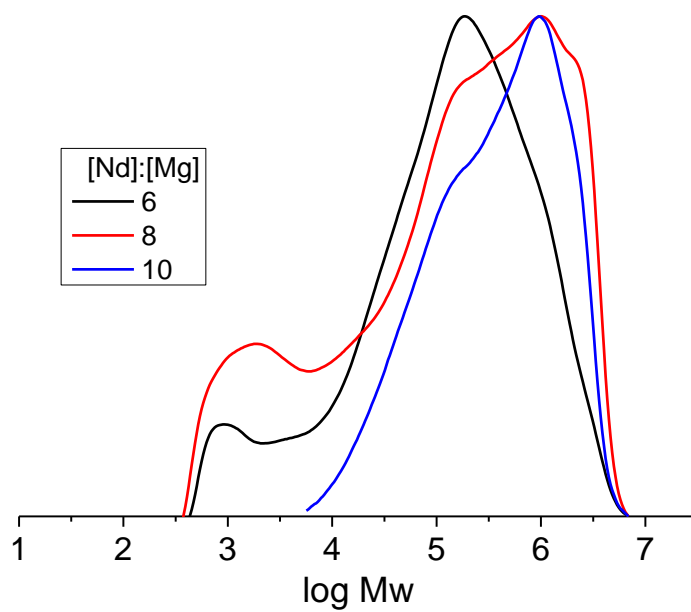

**Figure S11.** SEC curves at different  $[Nd]:[Mg]$  ratios at  $60^{\circ}C$  with an  $[Mon]:[Nd]$  ratio of 150. Experimental details in Table 2.

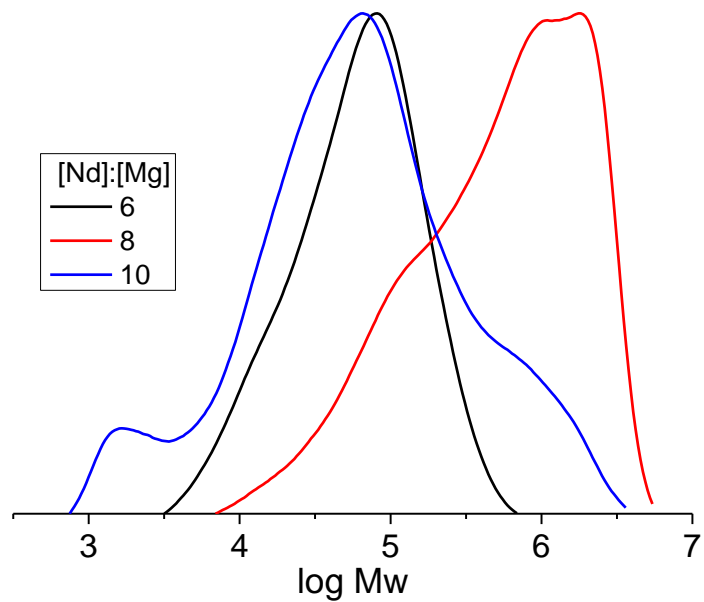

**Figure S12.** SEC curves at different [Nd]:[Mg] ratios at 70°C with an [Mon]:[Nd] ratio of 150. Experimental details in Table 2.

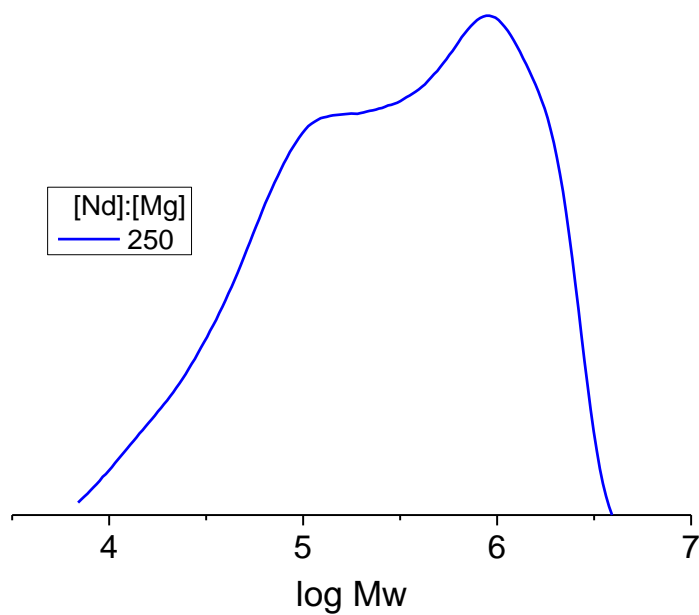

**Figure S13.** SEC curves at 70°C with an [Nd]:[Mg] ratio of 10. Experimental details in Table 2.

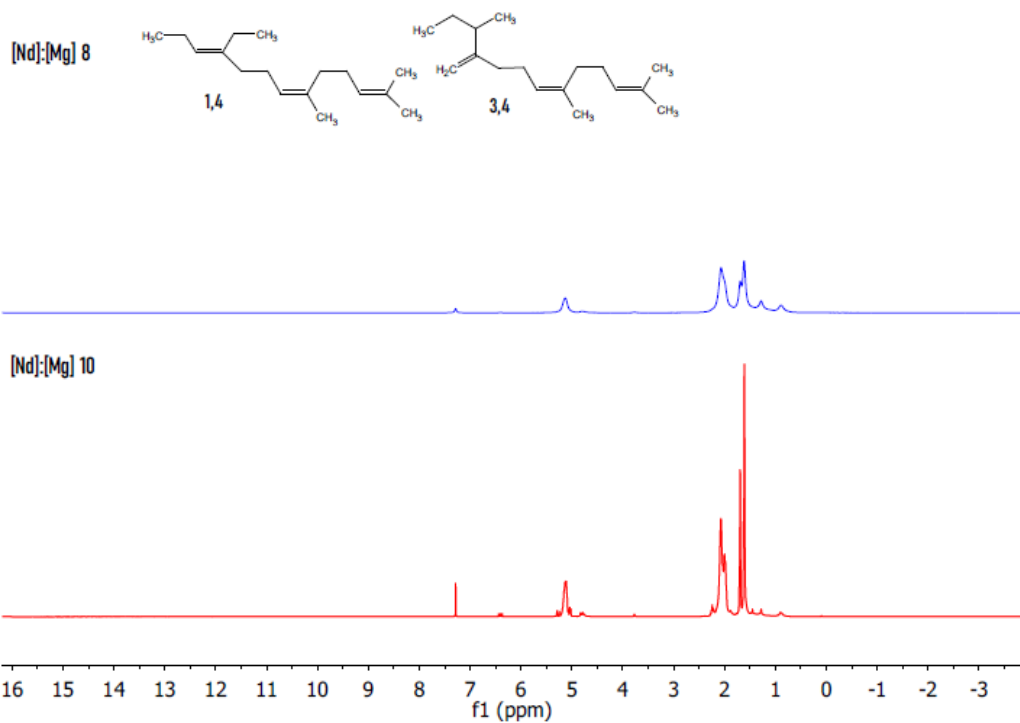

**Figure S14.**  $^1\text{H}$  NMR at different  $[\text{Nd}]:[\text{Mg}]$  ratios at  $60^\circ\text{C}$  with an  $[\text{Mon}]:[\text{Nd}]$  ratio of 150. Experimental details in Table 3.

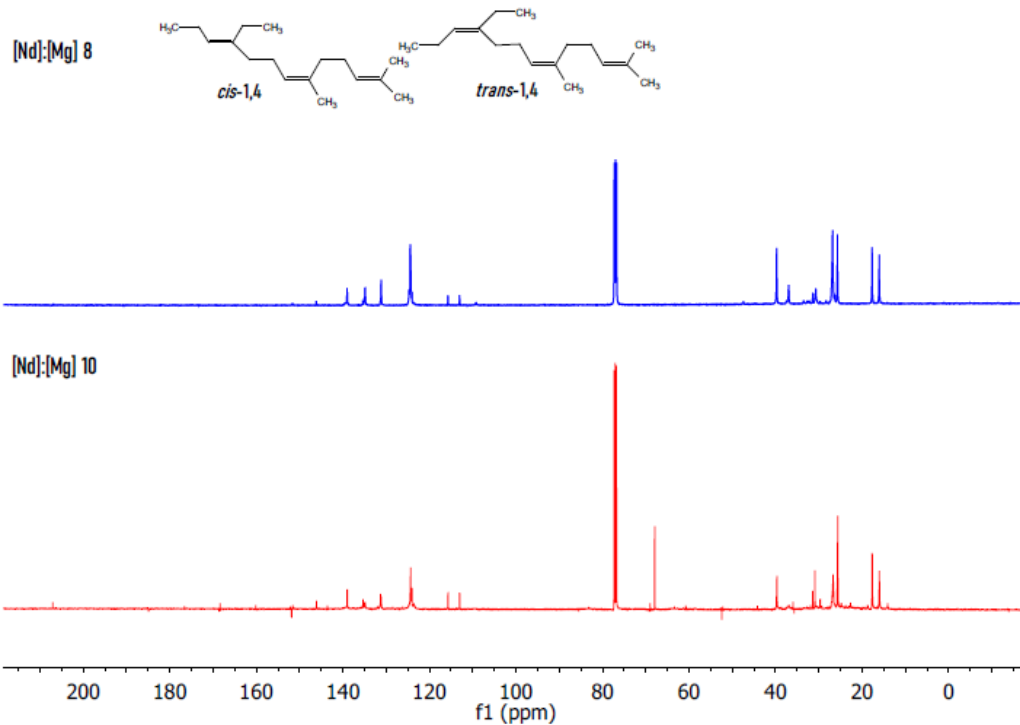

**Figure S15.**  $^{13}\text{C}$  NMR at different  $[\text{Nd}]:[\text{Mg}]$  ratios at  $60^\circ\text{C}$  with an  $[\text{Mon}]:[\text{Nd}]$  ratio of 150. Experimental details in Table 3.



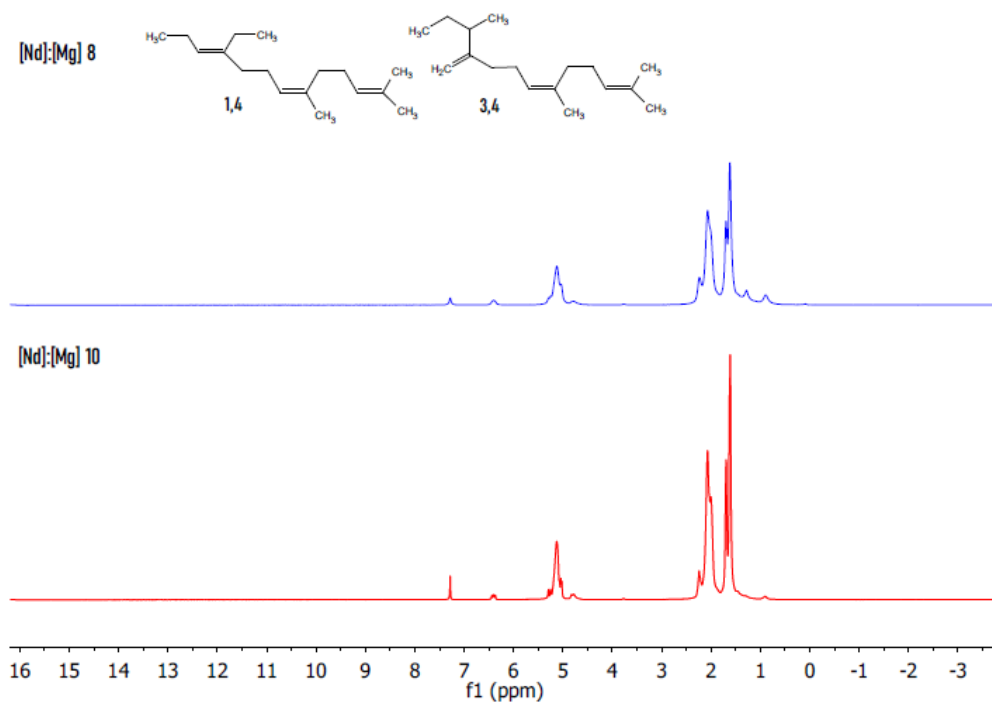

**Figure S16.**  $^1\text{H}$  NMR at different  $[\text{Nd}]:[\text{Mg}]$  ratios at  $70^\circ\text{C}$  with an  $[\text{Mon}]:[\text{Nd}]$  ratio of 150. Experimental details in Table 3.

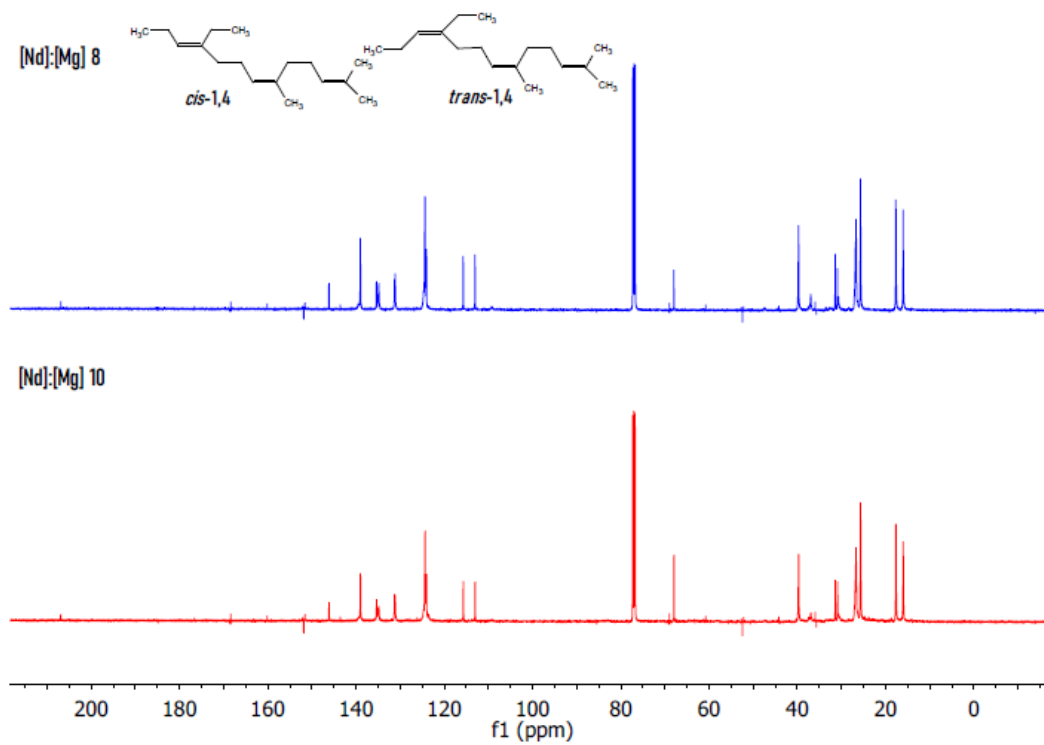

**Figure S17.**  $^{13}\text{C}$  NMR at different  $[\text{Nd}]:[\text{Mg}]$  ratios at  $70^\circ\text{C}$  with an  $[\text{Mon}]:[\text{Nd}]$  ratio of 150. Experimental details in Table 3.
